# Supplementary material for: Poly(styrene)-supported N-heterocyclic carbene coordinated iron chloride as a catalyst for delayed polyurethane polymerization
Source: Royal Society of Chemistry journal article supplement (doi:10.1039/c8ra07677d), 2018-01-01
Supplement: c8ra07677d1.pdf [file c8ra07677d1.pdf]

# Supporting Information

## **Poly(styrene)-supported *N*-heterocyclic carbene coordinated iron chloride as a catalyst for delayed polyurethane polymerization**

**Hyeon-Jun Noh<sup>1,†</sup>, T. Sadhasivam<sup>1,2,†</sup>, Do-Sung Jung<sup>1</sup>, Keundeuk Lee<sup>4</sup>, Mingu Han<sup>4</sup>, Ju-Young Kim<sup>3,\*</sup>, and Ho-Young Jung<sup>1,2,\*</sup>**

<sup>1</sup>*Department of Environment & Energy Engineering, Chonnam National University, 77 Yongbong-ro, Buk-gu, Gwangju 61186, Republic of Korea*

<sup>2</sup>*Center for Energy Storage System, Chonnam National University, 77 Yongbong-ro, Buk-gu, Gwangju 61186, Republic of Korea*

<sup>3</sup>*Department of Advanced Materials Engineering, Kangwon National University, Samcheok, Kangwon 245-711, Republic of Korea.*

<sup>4</sup>*4th R&D Institute 2nd Directorate Agency for Defense Development, Yuseoung P.O.Box 35, Daejeon, 34186, Korea*

\* Author to whom correspondence should be addressed.

Ho-Young Jung      E-mail:      jungho@jnu.ac.kr, jungho@chonnam.ac.kr

Ju-Young Kim      E-mail:      juyoungk@kangwon.ac.kr

† Authors Hyeon-Jun Noh and T. Sadhasivam contributed equally to this work and should be considered as co-first authors.

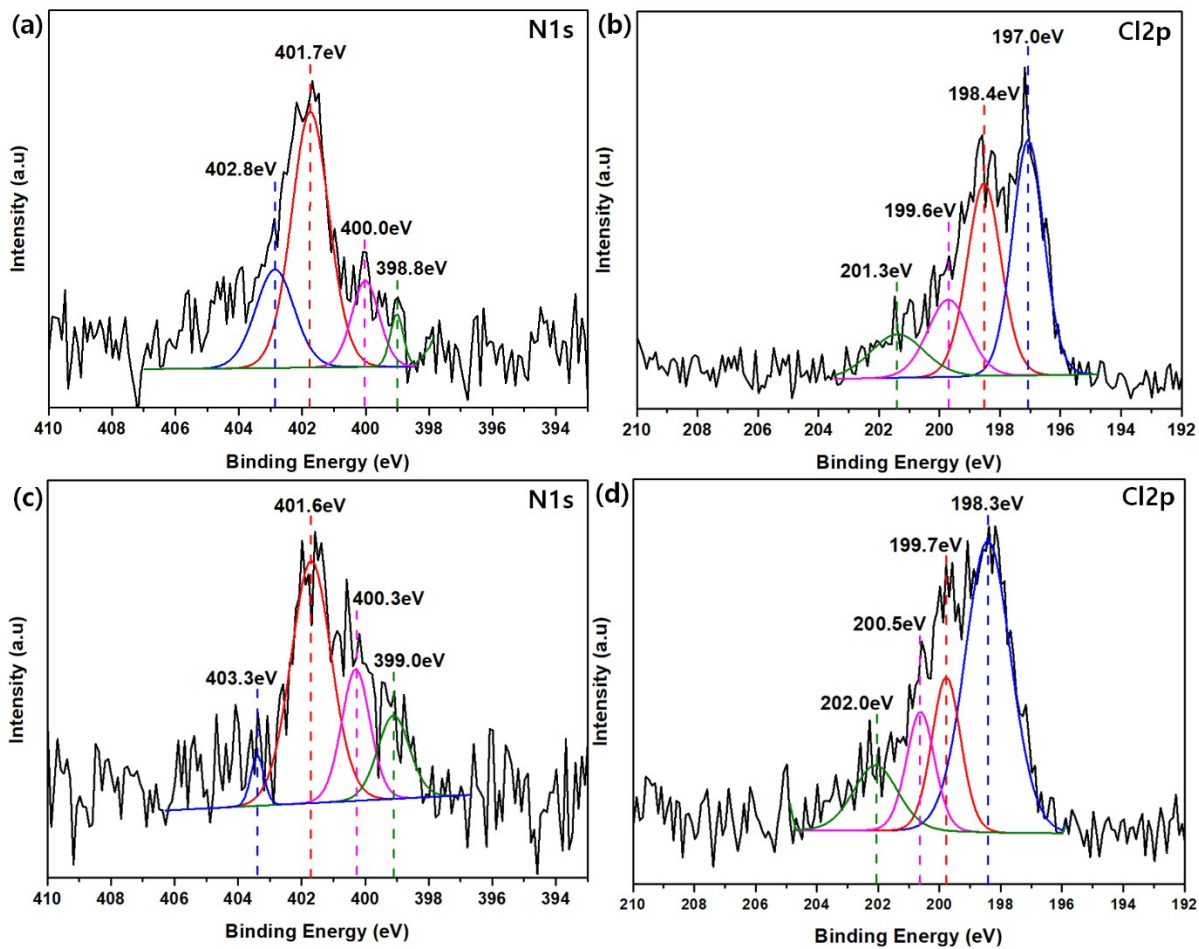

**Figure S1.** Deconvoluted XPS spectra of (a) N1s and (b) Cl in PS-Im and (a) N1s and (d) Cl in PS-Im-FeCl<sub>3</sub>.

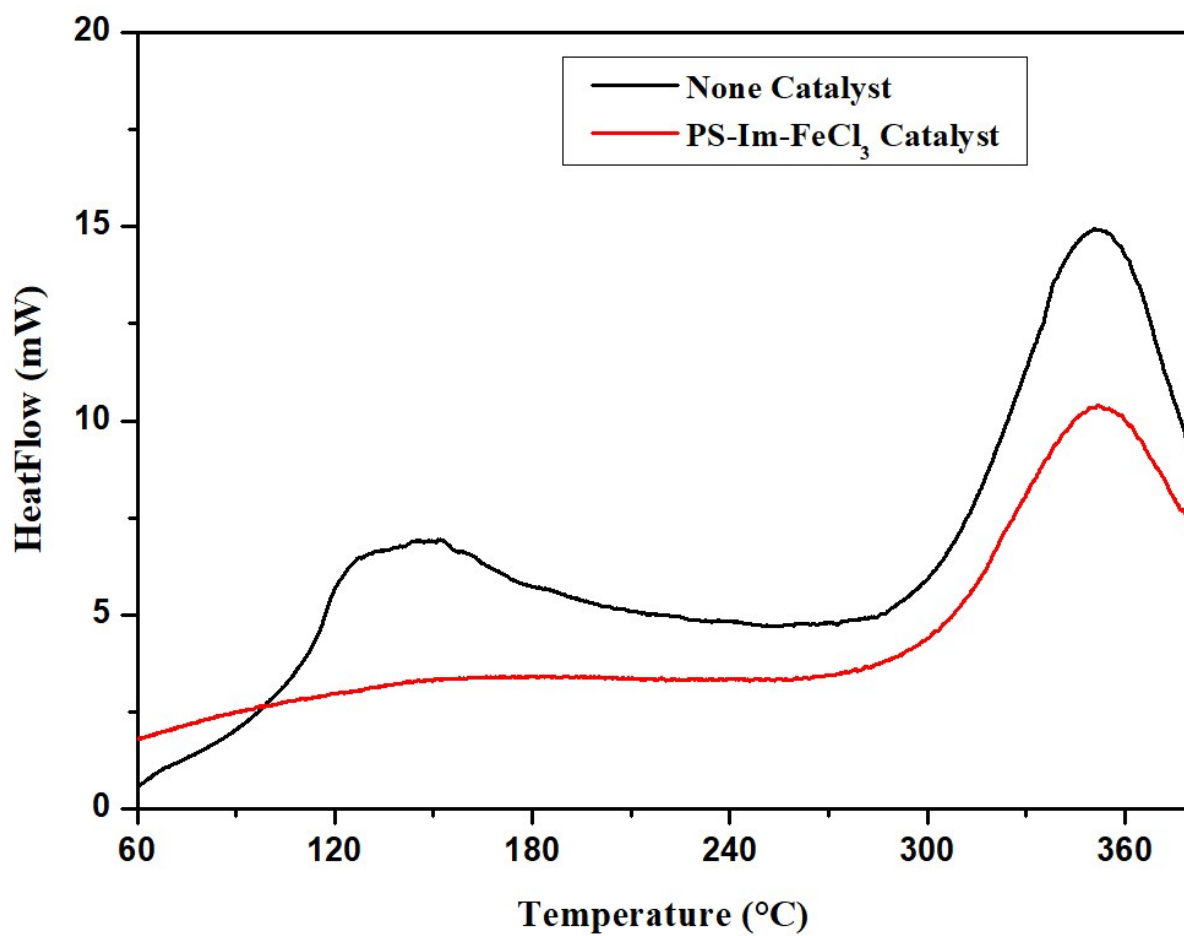

**Figure S2.** DSC non-isothermal curves with no catalyst and with the PS-Im-FeCl<sub>3</sub> catalyst obtained at a heating rate of 5 °C/min.

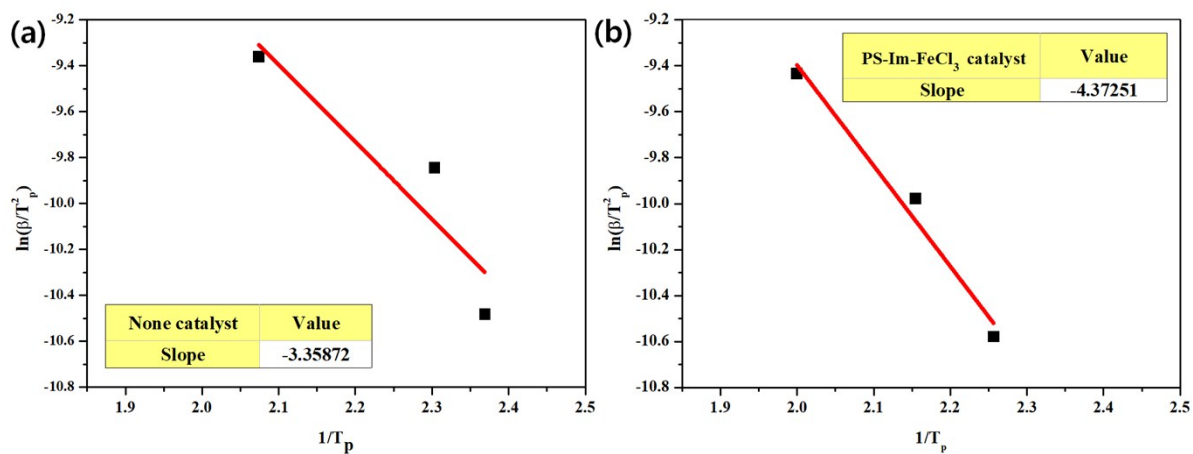

**Figure S3.** DSC fitting curves for the activation energy of (a) the no-catalyst system and (b) the PS-Im-FeCl<sub>3</sub> catalyst system.

**Table S1.** Viscosity measurements during PU polymerization with no catalyst and with TPB and PS-Im-FeCl<sub>3</sub> catalysts with respect to time.

| Time (h) | Viscosity (cP) |              |                                  |
|----------|----------------|--------------|----------------------------------|
|          | No catalyst    | TPB catalyst | PS-Im-FeCl <sub>3</sub> catalyst |
| 1        | 120            | 142          | 158                              |
| 2        | 64             | 157          | 54                               |
| 3        | 75             | 168          | 82                               |
| 4        | 84             | 3407         | 84                               |
| 5        | 85             | 5999         | 95                               |
| 6        | 91             | –            | 102                              |
| 7        | 93             | –            | 123                              |
| 8        | 98             | –            | 128                              |
| 9        | 150            | –            | 285                              |
| 10       | 250            | –            | 295                              |
| 11       | 684            | –            | 256                              |
| 12       | 887            | –            | 281                              |
| 13       | 982            | –            | 283                              |
| 14       | 1025           | –            | 382                              |
| 15       | 2052           | –            | 418                              |
| 16       | 3055           | –            | 851                              |
| 17       | 3825           | –            | 1205                             |
| 18       | 4005           | –            | 1823                             |
| 19       | 4825           | –            | 2483                             |
| 20       | 5105           | –            | 2853                             |
| 21       | 5340           | –            | 3848                             |
| 23       | 5999           | –            | 4585                             |
| 24       | –              | –            | 5215                             |
| 25       | –              | –            | 5999                             |
